# Supplementary material for: Evidence of fNIRS-Based Prefrontal Cortex Hypoactivity in Obesity and Binge-Eating Disorder
Source: PubMed Central journal article supplement (PMC7823505; doi:10.3390/brainsci11010019), 2020-12-26
Supplement: brainsci-11-00019-s001.pdf [file brainsci-11-00019-s001.pdf]

## **Supplementary Material for:**

Sarah A. Rösch, Ricarda Schmidt, Michael Lührs, Ann-Christine Ehlig, Swen Hesse, Anja Hilbert.

**Evidence of fNIRS-Based Prefrontal Cortex Hypoactivity in Obesity and Binge-Eating Disorder**

### **Supplementary Text**

1. Supplementary Methods

2. Supplementary Results

### **Supplementary Tables**

**Supplementary Table S1.** Participants' medication at the first assessment

**Supplementary Table S2.** Participants' ratings of food stimuli and nutritional information of food stimuli

**Supplementary Table S3.** Watching time and number of pictures when a joystick was pushed prior to expiration time in the passive viewing task

**Supplementary Table S4.** Group- and assessment-wise number of commission errors and go reaction time in the Go/NoGo task

**Supplementary Table S5.** Assignment of source-detector pairs to brain areas

### **Supplementary Figures**

**Supplementary Figure S1.** Sensitivity profile of the montage

**Supplementary Figure S2.** The position of the three ROIs DLPFC, IFG, and OFC in Colin27 atlas

### **Supplementary References**

## 1. Supplementary Methods

### 1.1. Participants' medication

**Supplementary Table S1.** Participants' medication at the first assessment

|                                            | OB<br><i>n</i> = 15 | OB+BED<br><i>n</i> = 13 | NW<br><i>n</i> = 12 | Test<br>statistics     | Effect<br>size | <i>p</i> value |
|--------------------------------------------|---------------------|-------------------------|---------------------|------------------------|----------------|----------------|
| Number of participants with medication     | 10<br>(67%)         | 6 (46%)                 | 4<br>(33%)          | $X^2(2, N = 40) = 2.8$ | $V = .26$      | .247           |
| Medication: <i>n</i> (%)                   |                     |                         |                     |                        | $V = .62$      | .334           |
| Cholesterol and blood lipid lowering drugs | 2 (13%)             | 0                       | 1 (8%)              |                        |                |                |
| Antihypertensive drugs                     | 6 (40%)             | 3 (23%)                 | 4<br>(33%)          |                        |                |                |
| Diabetes drugs                             | 4 (29%)             | 0                       | 0                   |                        |                |                |
| Thyroid drugs                              | 1 (7%)              | 2 (15%)                 | 0                   |                        |                |                |
| Pulmonary drug                             | 0                   | 2 (15%)                 | 0                   |                        |                |                |
| Psychotropic drugs                         | 1 (7%)              | 2 (23%)                 | 0                   |                        |                |                |
| Gout drugs                                 | 0                   | 1 (8%)                  | 0                   |                        |                |                |
| Cardiac drugs                              | 0                   | 1 (8%)                  | 0                   |                        |                |                |
| Cortisone drugs                            | 1 (7%)              | 0                       | 0                   |                        |                |                |
| Opioids                                    | 1 (7%)              | 0                       | 0                   |                        |                |                |
| Gastroesophageal reflux disease drugs      | 1 (7%)              | 0                       | 0                   |                        |                |                |
| Malaria prophylaxis                        | 1 (7%)              | 0                       | 0                   |                        |                |                |
| Anti-inflammatory drugs                    | 1 (7%)              | 0                       | 0                   |                        |                |                |
| Johannis herbs                             | 0                   | 1 (8%)                  | 0                   |                        |                |                |
| Musculoskeletal medication                 | 0                   | 1 (8%)                  | 0                   |                        |                |                |

The number of participants who took medication stable according to our inclusion criteria did not differ between groups,  $X^2(2, N = 40) = 2.8, p = .247$  (see Supplementary Table S1). Likewise, medication was not differentially distributed between groups (Fisher's exact test,  $p = .334$ ).

## 1.2. Food Stimuli Ratings

There was no significant main effect of group,  $F(2, 37) = 0.07, p = .937, \eta^2 = .00$ , in craving ratings. In contrast, there was a statistically significant, large difference in the proportion of food pictures being classified as binge food,  $H(2) = 23.48, p < .001, \eta^2 = .42$ . Pairwise Bonferroni-corrected comparisons for the proportion of food pictures being classified as binge food validated the group assignment: there were significant differences between the group with obesity and binge-eating disorder (OB+BED) compared to the group with obesity (OB),  $p = .001$  and the group with normal weight (NW),  $p < .001$ , but not between OB and NW groups,  $p = .163$ . Based on the nutritional information provided by Blechert et al. (2014) [1], there was no statistically significant difference in caloric content of the selected food stimuli between groups,  $H(2) = 4.16, p = 0.125, \eta^2 = 0.06$ . Participants' ratings as well as nutritional information are shown in Supplementary Table S2.

**Supplementary Table S2.** Participants' ratings of food stimuli and nutritional information of food stimuli

|                          | OB                     | OB+BED                 | NW                     | Test statistics   | Effect size     | <i>p</i> value | Post-hoc tests              |
|--------------------------|------------------------|------------------------|------------------------|-------------------|-----------------|----------------|-----------------------------|
|                          | <i>n</i> = 15          | <i>n</i> = 13          | <i>n</i> = 12          |                   |                 |                |                             |
|                          | <i>M</i> ( <i>SD</i> ) | <i>M</i> ( <i>SD</i> ) | <i>M</i> ( <i>SD</i> ) |                   |                 |                |                             |
| Craving                  | 65.72 (25.99)          | 63.36 (25.99)          | 63.60 (21.81)          | $F(2, 37) = 0.07$ | $\eta^2 = .000$ | .937           |                             |
| Binge food, <i>n</i> (%) | 4.20 (35%)             | 11.95 (96%)            | 0.33 (3%)              | $H(2) = 23.48$    | $\eta^2 = .422$ | < .001         | OB+BED > OB,<br>OB+BED > NW |
| Kilocalories/100g        | 565.65 (277.22)        | 786.42 (261.28)        | 575.76 (362.92)        | $H(2) = 4.16$     | $\eta^2 = .060$ | .125           |                             |

Note. The ratings for craving ranged from 0 to 100, with higher values indicating higher levels of craving. Binge food describes the group-wise mean number of stimuli displayed during the tasks that were classified as binge foods (in total, 12 food stimuli were displayed). Information on caloric content derived from [1]. Effect sizes were reported as  $\eta^2$  and interpreted as small (.01), medium (.06), and large (.14).

### 1.3. FNIRS Data Acquisition

The probabilistic path of photon through cortex were estimated using the Monte-Carlo transport software tMCimg via the Atlas Viewer from Homer2 [2,3]. The optodes' placement and the results of the simulation are shown in Supplementary Figure S1. Before starting the experiment a calibration was performed in order to check each optode's signal quality.

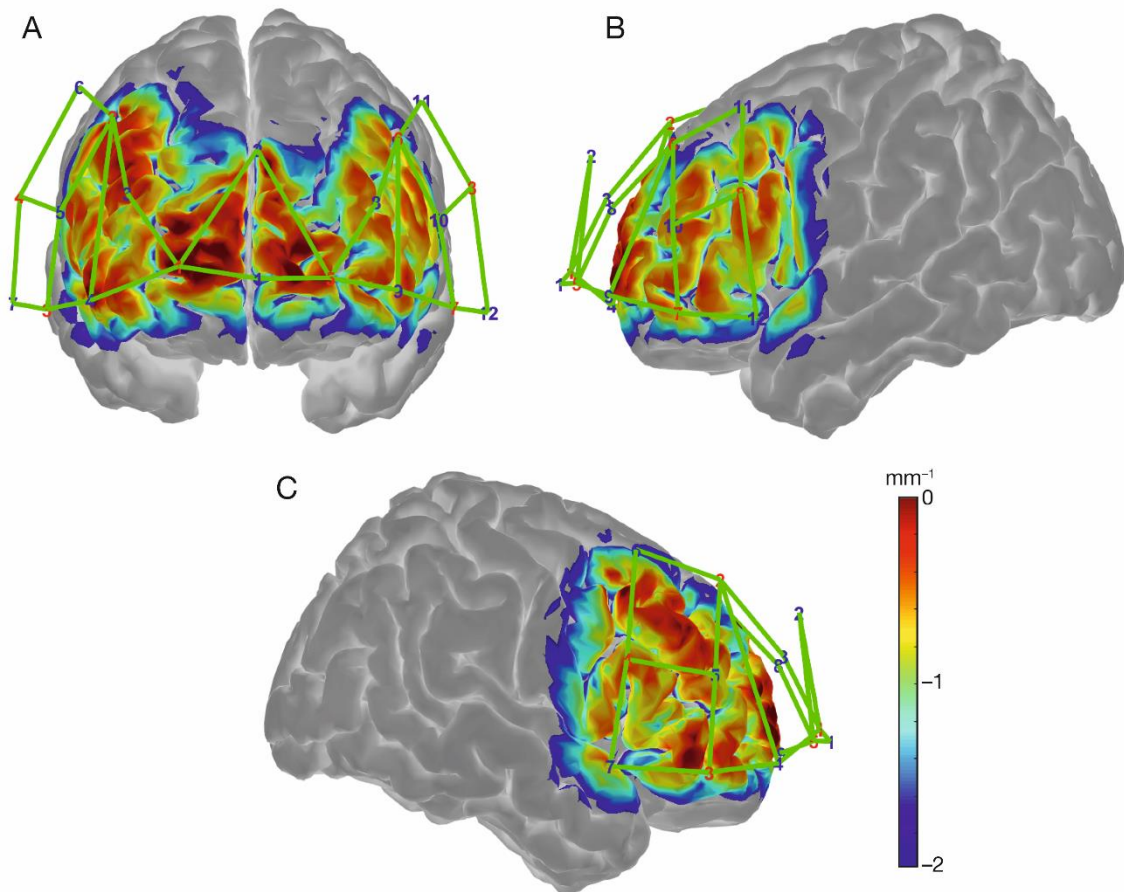

**Supplementary Figure S1.** Sensitivity profiles for cortical regions of interest. Color scale depicts relative sensitivity to hypothetical cortical activation logarithmically from -2 to 0 in  $\log_{10}$  units.

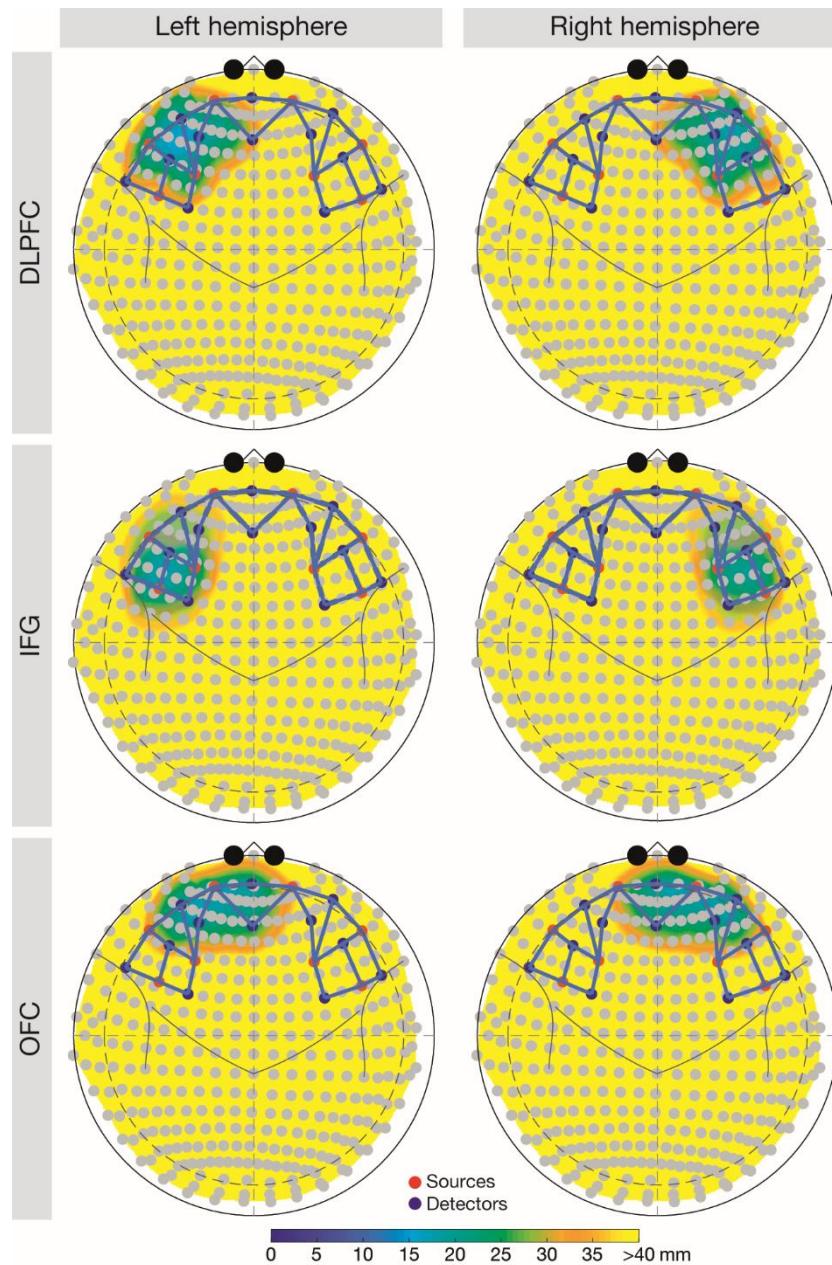

**Supplementary Figure S2.** The position of the three ROIs DLPFC (Brodmann area [BA] 46), IFG (BA 44 and 45) and OFC (BA 10) in Colin27 [4] atlas, which was used in combination with the automatic anatomical labeling toolbox. The color map represents the depth from each source or detector in the ROI to the head surface in topology maps (Clarke azimuthal map projection). Yellow colour indicates a depth of greater than 40mm, which is inaccessible to fNIRS light. DLPFC, dorsolateral prefrontal cortex; IFG, inferior frontal gyrus; OFC, orbitofrontal cortex

**Supplementary Table S3.** Assignment of source-detector pairs to brain areas

| Channel              | Brodmann Area | Description                         | fOLD area        | ROI assignment in the study |
|----------------------|---------------|-------------------------------------|------------------|-----------------------------|
| S1 – D1              | BA 10 right   | Frontal superior right              | BA 10/11 right   | OFC right                   |
| S1 – D2 <sup>a</sup> | BA 10 right   | Frontal superior right              | BA 10 right      | OFC right                   |
| S1 – D3              | BA 10 right   | Frontal middle right                | BA 10 right      | OFC right                   |
| S1 – D4              | BA 10 right   | Frontal middle right                | BA 10/11 right   | OFC right                   |
| S2 – D3              | BA 46 right   | Frontal middle right                | BA 9/45/46 right | DLPFC right                 |
| S2 – D4 <sup>b</sup> | BA 46 right   | Frontal middle right                | BA 46 right      | DLPFC right                 |
| S2 – D5              | BA 45 right   | Frontal inferior triangularis right | BA 45/46 right   | IFG right                   |
| S2 – D6              | BA 44 right   | Frontal middle right                | BA 9/44/45 right | IFG right                   |
| S3 – D4              | BA 47 right   | Frontal inferior orbital right      | BA 45 right      | IFG right                   |
| S3 – D5              | BA 45 right   | Frontal inferior triangularis right | BA 45 right      | IFG right                   |
| S3 – D7              | BA 38 right   | Temporal pole middle right          | none             | excluded                    |
| S4 – D5              | BA 45 right   | Frontal inferior triangularis right | BA 45            | IFG                         |
| S4 – D6              | BA 6 right    | Precentral right                    | BA 44 right      | excluded                    |
| S4 – D7              | BA 38 right   | Temporal pole superior right        | None             | excluded                    |
| S5 – D1              | BA 10 left    | Frontal superior medial left        | BA 10/11 left    | OFC left                    |
| S5 – D2 <sup>a</sup> | BA 10 left    | Frontal superior left               | BA 10 left       | OFC left                    |
| S5 – D8              | BA 10 left    | Frontal superior left               | BA 10/46 left    | OFC left                    |
| S5 – D9              | BA 11 left    | Frontal superior left               | BA 10/11 left    | OFC left                    |
| S6 – D8              | BA 46 left    | Frontal middle left                 | BA 9/45/46       | DLPFC left                  |
| S6 – D9 <sup>b</sup> | BA 46 left    | Frontal middle left                 | BA 46 left       | DLPFC left                  |
| S6 – D10             | BA 45 left    | Frontal middle left                 | BA 45/46 left    | IFG left                    |
| S6 – D11             | BA 44 left    | Frontal middle left                 | BA 9 left        | IFG left                    |
| S7 – D9              | BA 46 left    | Frontal middle left                 | BA 45 left       | IFG left                    |

| Channel  | Brodmann Area | Description                        | fOLD area     | ROI assignment in the study |
|----------|---------------|------------------------------------|---------------|-----------------------------|
| S7 – D10 | BA 45 left    | Frontal inferior triangularis left | BA 45 left    | IFG left                    |
| S7 – D12 | BA 47 left    | Frontal inferior orbital left      | None          | excluded                    |
| S8 – D10 | BA 45 left    | Frontal inferior triangularis left | BA 44/45 left | IFG left                    |
| S8 – D11 | BA 6 left     | Precentral left                    | BA 44 left    | excluded                    |
| S8 – D12 | BA 6 left     | Frontal inferior oper left         | None          | excluded                    |

Note. BA, Brodmann area; DLPFC, dorsolateral prefrontal cortex; fOLD, fNIRS Optodes' Location Decider; IFG, inferior frontal gyrus; OFC, orbitofrontal cortex. The description in columns 2 and 3 is based on the BrainAnalyzIR [5] toolbox, the description in Columns 4 and 5 is based on fNIRS Optodes' Location Decider [6] with at least 30% specificity for the corresponding BA.

<sup>a</sup> source-detector separation at 4.5 cm. <sup>b</sup> source-detector separation at 5.5 cm.



## 2. Supplementary Results

### 2.1. Behavioural data - passive viewing task

**Supplementary Table S4.** Watching time and number of pictures when a joystick was pushed prior to expiration time in the passive viewing task

|                                                           | Assessment | OB <sup>a</sup><br><i>n</i> = 10 | OB+BED<br><i>n</i> = 12 | NW<br><i>n</i> = 12    | Test statistics | <i>p</i> -value | Effect size    | Post-hoc tests   |
|-----------------------------------------------------------|------------|----------------------------------|-------------------------|------------------------|-----------------|-----------------|----------------|------------------|
|                                                           |            | <i>M</i> ( <i>SD</i> )           | <i>M</i> ( <i>SD</i> )  | <i>M</i> ( <i>SD</i> ) |                 |                 |                |                  |
| Watching time per<br>picture, s                           | T1         | 1.80 (1.32)                      | 1.33 (0.78)             | 2.27 (1.39)            | $H(2) = 226.54$ | < .001          | $\eta^2 = .11$ | OB+BED < OB < NW |
|                                                           | T2         | 1.81 (1.26)                      |                         | 1.73 (0.99)            | $H(2) = 1.19$   | .274            | $\eta^2 = .00$ |                  |
| Pictures pushed prior to<br>expiration time, <i>n</i> (%) | T1         | 54.30 (91%)                      | 59.33 (99%)             | 52.42 (87%)            | $H(2) = 2.60$   | .272            | $\eta^2 = .05$ |                  |
|                                                           | T2         | 54.36 (91%)                      |                         | 58.75 (97%)            | $H(1) = 0.262$  | .608            | $\eta^2 = .00$ | OB < NW          |

Note. Data are only displayed for individuals with valid fNIRS data. Pictures pushed describes the group-wise mean number of stimuli displayed during the tasks where the joystick has been pushed before the maximum viewing time had been expired (in total, 60 food stimuli were displayed). Effect sizes were reported as  $\eta^2$  and interpreted as small (.01), medium (.06), and large (.14).

<sup>a</sup>Due to recording problems, data for the passive viewing task were not available for *n* = 3 individuals in the first and for *n* = 2 individuals in the second assessment for the OB group.

For the first assessment, there was a statistically significant, medium-sized difference in the time participants observed pictures in the passive viewing task,  $H(2) = 226.54$ ,  $p < .001$ ,  $\eta^2 = .11$  (Supplementary Table S4). The shortest viewing times were observed in the OB+BED group, followed by the OB group, with the NW group showing the largest viewing times. Pairwise Bonferroni-corrected comparisons confirmed significant differences between all groups, all  $p < .001$ . For the second assessment, there was no statistically significant difference in the time participants in the OB and NW groups observed pictures in the passive viewing task,  $H(1) = 1.20$ ,  $p = .274$ ,  $\eta^2 = .00$ .

Likewise, there was no statistically significant in either of the assessments in the number of pictures where the joystick was pushed prior to expiration time, first assessment:  $H(2) = 2.60$ ,  $p = .272$ ,  $\eta^2 = .05$ , second assessment:  $H(1) = 0.26$ ,  $p = .609$ ,  $\eta^2 = .00$ .

2.2. Behavioural data - Go/NoGo task

**Supplementary Table S5.** Group- and assessment-wise number of commission errors and go reaction time in the Go/NoGo

|                             | Asse | OB <sup>a</sup>        | OB+BED                 | NW                     | Test statistics        | <i>p</i> -value | Effect size    | Post-hoc tests    |
|-----------------------------|------|------------------------|------------------------|------------------------|------------------------|-----------------|----------------|-------------------|
|                             | ssme | <i>n</i> = 13          | <i>n</i> = 12          | <i>n</i> = 12          |                        |                 |                |                   |
|                             | nt   |                        |                        |                        |                        |                 |                |                   |
|                             |      | <i>M</i> ( <i>SD</i> ) | <i>M</i> ( <i>SD</i> ) | <i>M</i> ( <i>SD</i> ) |                        |                 |                |                   |
| Commission errors, <i>n</i> | T1   | 1.15 (1.52)            | 1.08 (1.08)            | 1.00 (1.41)            | <i>H</i> (2) = 0.23    | .890            | $\eta^2 = .05$ |                   |
|                             | T2   | 1.33 (1.50)            |                        | 0.25 (0.62)            | <i>H</i> (1) = 5.34    | .021            | $\eta^2 = .17$ | OB > NW           |
| Reaction time, ms           | T1   | 2.19 (0.46)            | 3.86 (0.51)            | 0.74 (0.43)            | <i>H</i> (2) = 2361.20 | < .001          | $\eta^2 = .89$ | OB+BED > OB > NW, |
|                             | T2   | 2.32 (0.50)            |                        | 0.76 (0.54)            | <i>H</i> (1) = 1396.90 | < .001          | $\eta^2 = .72$ | OB > NW           |

Note. Data are only displayed for individuals with valid fNIRS data. Effect sizes were reported as  $\eta^2$  and interpreted as small (.01), medium (.06), and large (.14).

<sup>a</sup>*n* = 12 individuals for the second assessment

At the first assessment, groups did not differ in the number of commission errors,  $H(2) = 0.23$ ,  $p = 0.890$ ,  $\eta^2 = .05$  (Supplementary Table S5). However, there was a statistically significant, large difference in reaction time,  $H(24) = 2361.20$ ,  $p < .001$ ,  $\eta^2 = .89$ , with the largest reaction times being observed in OB+BED, followed by the OB group, and the NW group showing the shortest reaction times. Pairwise Bonferroni-corrected comparisons confirmed significant differences between all groups, all  $p < .001$ .

Considering the second assessment only, the OB group showed a significantly higher number of commission errors than individuals with NW,  $H(2) = 5.34$ ,  $p = .021$ ,  $\eta^2 = .17$ , and there was a statistically significant, large difference in reaction time, with individuals with OB having larger reaction times as compared to individuals with NW,  $H(23) = 1396.90$ ,  $p < .001$ ,  $\eta^2 = .72$ .

### Supplementary References

1. Blechert, J.; Meule, A.; Busch, N.A.; Ohla, K. Food-pics: An image database for experimental research on eating and appetite. *Front Psychol* **2014** *5*,1–10.
2. Aasted, C.M.; Yücel, M.A.; Cooper, R.J. Anatomical guidance for functional near-infrared spectroscopy: Atlasviewer tutorial. *Neurophotonics* **2015** *2*,020801–020801.
3. Boas, D.A.; Culver, J.P.; Stott, J.J.; Dunn, A.K. Three dimensional monte carlo code for photon migration through complex heterogeneous media including the adult human head. *Opt Express* **2002** *10*,159-170.
4. Holmes, C.J.; Hoge, R.; Collins, L.; Woods, R.; Toga, A.W.; Evans, A.C. Enhancement of MR images using registration for signal averaging. *J Comput Assist Tomogr* **1998** *22*, 324–333.
5. Santosa, H.; Zhai, X.; Fishburn, F.; Huppert, T. The NIRS Brain AnalyzIR Toolbox. *Algorithms* **2018** *11*:73.
6. Zimeo Morais, G.A.; Balardin, J.B.; Sato, J.R. 2018. FNIRS Optodes' Location Decider (fOLD): a toolbox for probe arrangement guided by brain regions-of-interest. *Scientific Reports* **2018** *8*:1–11.
